# Supplementary material
Source: Springer Nature journal article supplement (https://www.springermedizin.de/resource/supplementary/12916_2009_226_MOESM4_ESM.pdf/9599436)

### No TRIM5

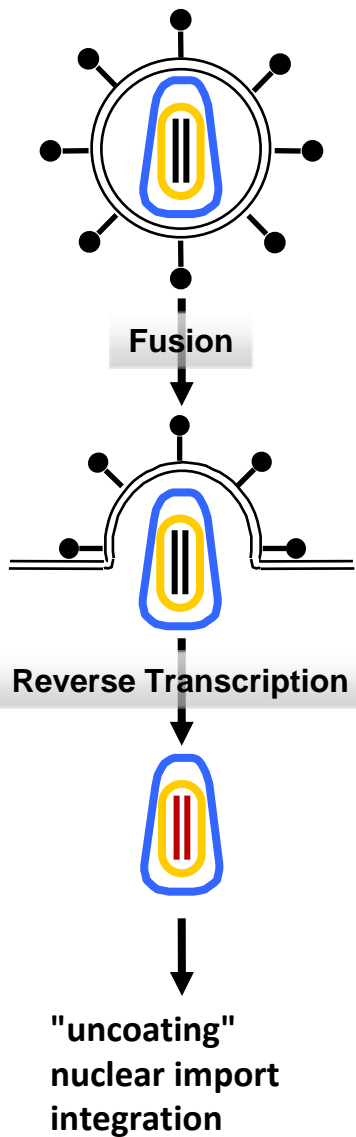

### TRIM5 (Sufficiency Model)

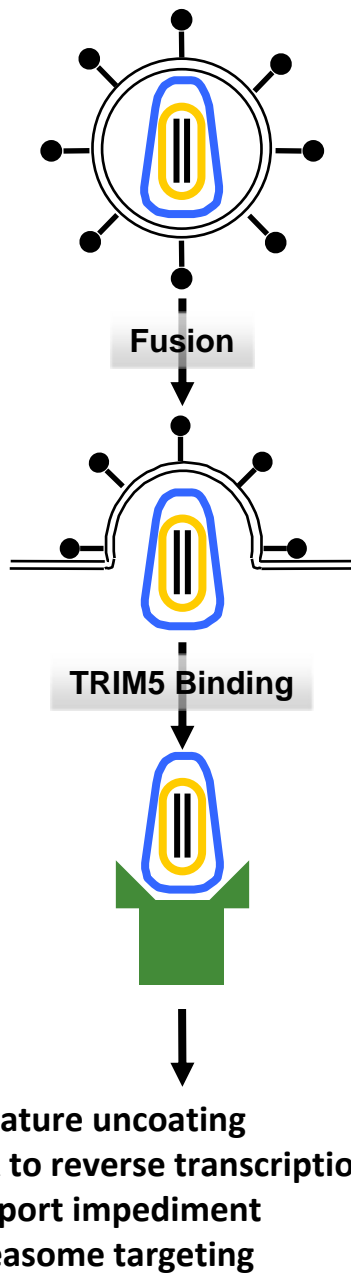

### TRIM5 (Cofactor Model)

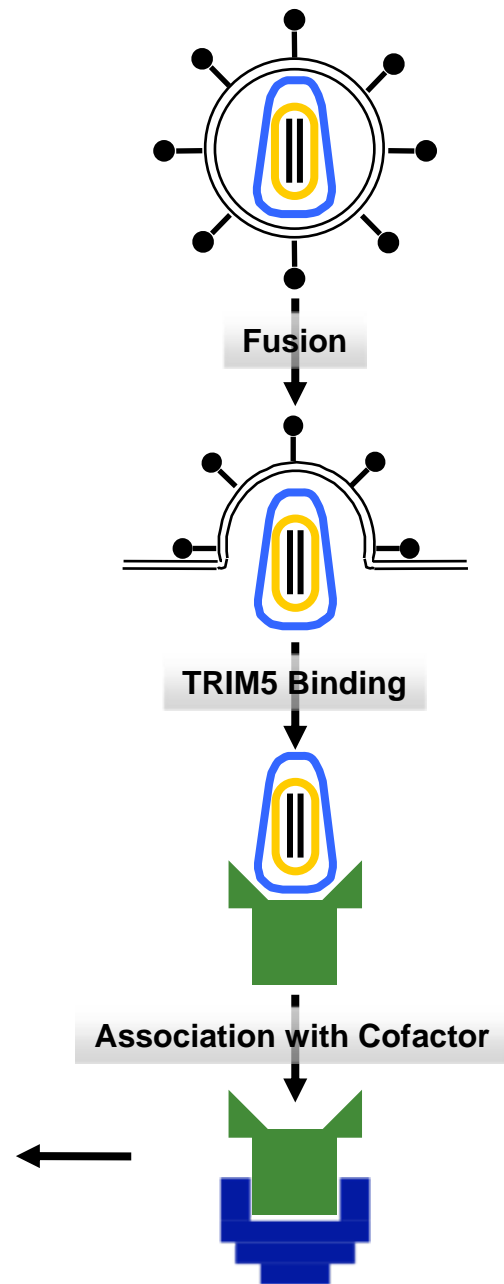

Supplement: MOESM4 [file 9599436]
